# Supplementary material for: Germline Melanocortin-1-Receptor Genotype Is Associated with Severity of Cutaneous Phenotype in Congenital Melanocytic Nevi: A Role for MC1R in Human Fetal Development
Source: PubMed Central journal article supplement — J Invest Dermatol. 2012 May 10;132(8):2026–32. doi: 10.1038/jid.2012.95 (PMC3398254; doi:10.1038/jid.2012.95), 2012-05-10
Supplement: jid201295x1.pdf [file jid201295x1.pdf]

**Supplementary table 1**

Comparison of prevalence of individual *MC1R* variants between cohorts, White Caucasian Northern European children only.

|                   | <b>CMN cohort n (%)</b> | <b>Control group B, n (%)</b> | <b>Fisher's exact p value</b> |
|-------------------|-------------------------|-------------------------------|-------------------------------|
| <b>R alleles</b>  | 30/84 (35.7)            | 102/270 (37.8)                | 0.7966                        |
| <b>T314T</b>      | 21/84 (25.0)            | 49/275 (17.8)                 | 0.1580                        |
| <b>V92M</b>       | 20/84 (23.8)            | 39/270 (14.4)                 | 0.0638                        |
| <b>V60L</b>       | 17/84 (20.2)            | 61/270 (22.6)                 | 0.7634                        |
| <b>R151C</b>      | 15/84 (17.9)            | 42/270 (15.6)                 | 0.6127                        |
| <b>R163Q</b>      | 12/84 (14.3)            | 21/270 (7.8)                  | 0.0859                        |
| <b>R160W</b>      | 6/84 (7.1)              | 42/270 (15.6)                 | 0.0664                        |
| <b>D294H</b>      | 6/84 (7.1)              | 9/275 (3.3)                   | 0.1308                        |
| <b>R306H</b>      | 2/84 (2.4)              | 0/270 (0.0)                   | 0.0542                        |
| <b>D84E</b>       | 3/84 (3.6)              | 9/270 (3.3)                   | 0.7387                        |
| <b>R142H</b>      | 2/84 (2.4)              | 2/270 (0.7)                   | 0.2387                        |
| <b>I155T</b>      | 2/84 (2.4)              | 5/270 (1.9)                   | 0.6718                        |
| <b>S316S</b>      | 1/84 (1.2)              | 3/278 (1.1)                   | 1.0000                        |
| <b>N29K</b>       | 1/84 (1.2)              | 0/270 (0.0)                   | 0.2394                        |
| <b>frameshift</b> |                         |                               |                               |
| <b>L192L</b>      | 1/84 (1.2)              | 0/270 (0.0)                   | 0.2394                        |
| <b>Q233Q</b>      | 1/84 (1.2)              | 0/270 (0.0)                   | 0.2394                        |
| <b>G293G</b>      | 1/84 (1.2)              | 0/270 (0.0)                   | 0.2394                        |
